# Supplementary material for: Differential Mutation Detection Capability Through Capture-Based Targeted Sequencing in Plasma Samples in Hepatocellular Carcinoma
Source: PubMed Central journal article supplement (PMC8120297; doi:10.3389/fonc.2021.596789), 2021-04-30
Supplement: DataSheet_6.pdf [file DataSheet_6.pdf]

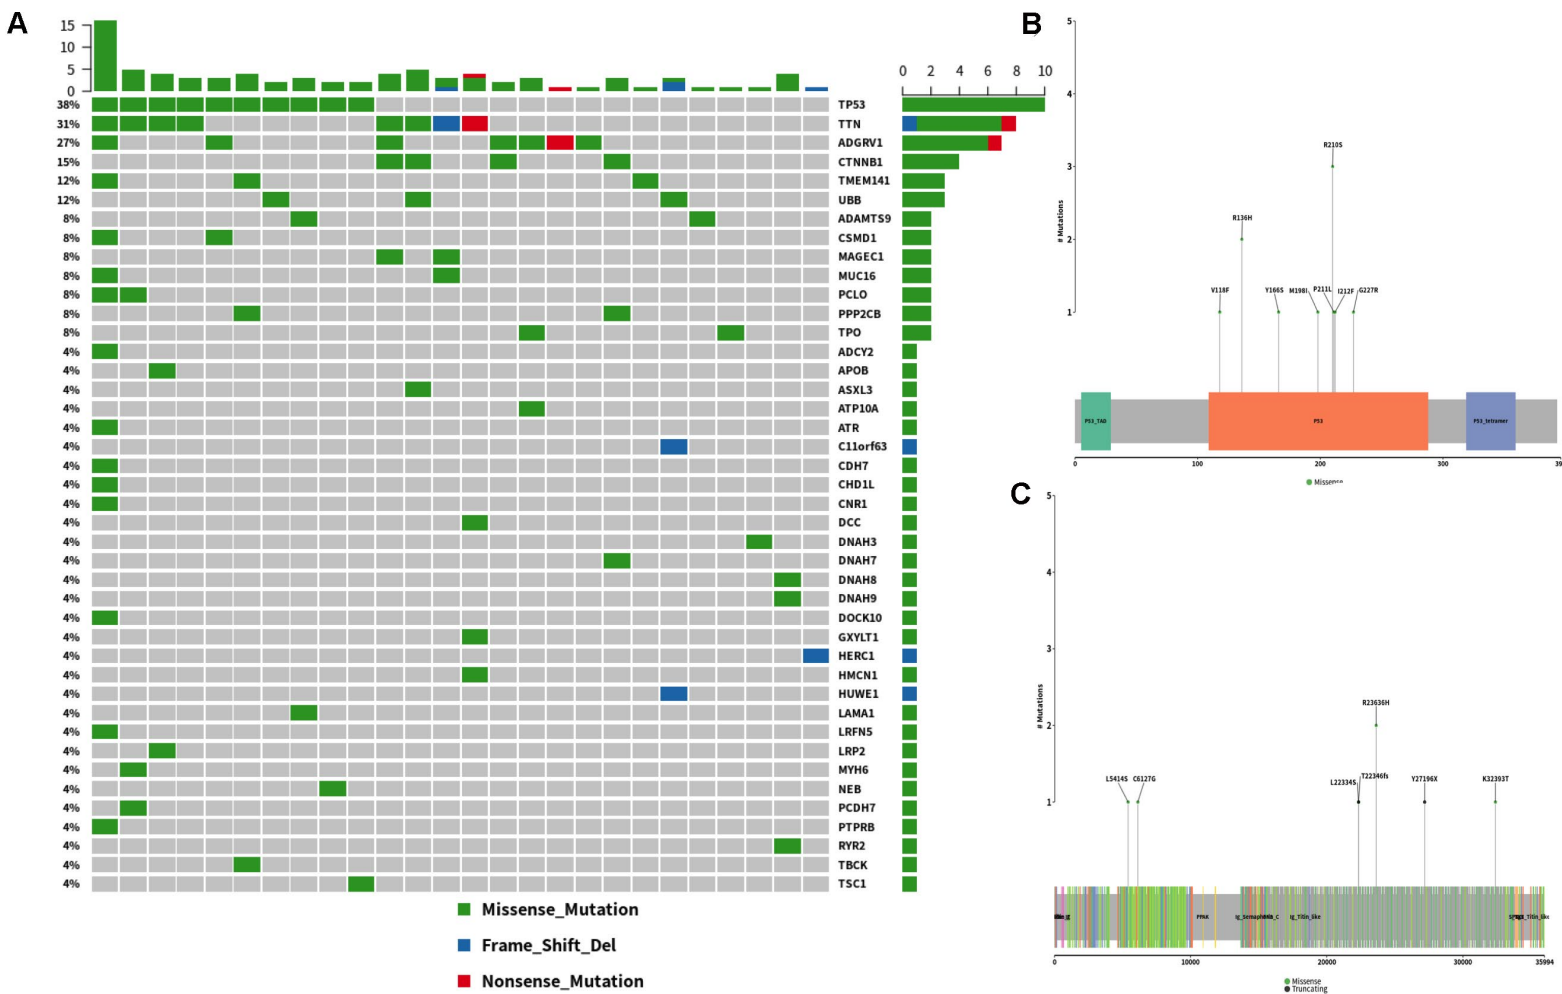

**Figure S6. Genetic aberration events and typical mutation details.** All genetic aberration events identified for HCC samples, including (A) missense mutation, frame shift deletion, and nonsense mutation. (B) and (C) Summary of mutations located in *TTN* and *TP53* for HCC samples.
